# Supplementary material for: Stability evaluation of compounded hydroxyurea 100 mg/mL oral liquids using a novel analytical method involving chemical derivatization
Source: PubMed Central journal article supplement (PMC9231814; doi:10.1371/journal.pone.0270206), 2022-06-24
Supplement: pone.0270206.s002.pdf [file pone.0270206.s002.pdf]

| <b>Original capsules</b>           | <b>Generic capsules</b>            |
|------------------------------------|------------------------------------|
| Hydroxyurea                        | Hydroxyurea                        |
| Lactose monohydrate                | Colloidal silicon dioxide          |
| Magnesium stearate                 | Magnesium stearate                 |
| Citric acid anhydrous              | Gelatin <sup>a</sup>               |
| Sodium phosphate dibasic anhydrous | Titanium dioxide <sup>a</sup>      |
| Erythrosine <sup>a</sup>           | D & C Red #28 <sup>a</sup>         |
| Gelatin <sup>a</sup>               | FD & C Blue #1 <sup>a</sup>        |
| Titanium dioxide <sup>a</sup>      | FD & C Red #40 <sup>a</sup>        |
| Indigo carmine <sup>a</sup>        | D & C Yellow # 10 <sup>a</sup>     |
| Yellow iron oxide <sup>a</sup>     | Black SW-9008/SW-9009 <sup>a</sup> |

<sup>a</sup> Capsules shell
